# Supplementary material for: The Impact of Dairy Products in the Development of Type 2 Diabetes: Where Does the Evidence Stand in 2019?
Source: PubMed Central journal article supplement — Adv Nutr. 2019 May 24;10(6):1066–75. doi: 10.1093/advances/nmz050 (PMC6855942; doi:10.1093/advances/nmz050), 2019-05-24
Supplement: nmz050_supplemental_file.pdf [file nmz050_supplemental_file.pdf]

Supplementary Data

**The impact of dairy products in the development of type 2 diabetes: where does the evidence stand in 2019?**

Jing Guo, D. Ian Givens, Arne Astrup, Stephan J. L. Bakker, Gijs H. Goossens, Mario Kratz, André Marette, Hanno Pijl, Sabita S. Soedamah-Muthu

## Supplementary Data

Supplemental Table 1. Cohort studies that assessed the association between dairy consumption and type 2 diabetes risk (in alphabetical order).

| Reference/<br>country                                          | was used<br>in<br>Gijssbers<br>et al. (1) | was<br>used in<br>Gao et<br>al. (2) | was<br>used in<br>Aune et<br>al. (3) | Study<br>design               | Study participants (number,<br>gender, age, BMI)                 | Dairy types        | Definition                                                                                                                                                              | Calculation<br>method        | Outcome measures and<br>effect                             |
|----------------------------------------------------------------|-------------------------------------------|-------------------------------------|--------------------------------------|-------------------------------|------------------------------------------------------------------|--------------------|-------------------------------------------------------------------------------------------------------------------------------------------------------------------------|------------------------------|------------------------------------------------------------|
| Brouwer-<br>Broelsma et<br>al. 2016<br>(4)/<br>Netherland<br>s | N                                         | N                                   | N                                    | Longitudinal,<br>9.5<br>years | 2974 men and women, aged<br>65 years, BMI 26.0 kg/m <sup>2</sup> | Total dairy        | All dairy products, except butter.                                                                                                                                      | Semi-<br>quantitative<br>FFQ | No association with T2D                                    |
|                                                                |                                           |                                     |                                      |                               |                                                                  | Skimmed dairy      | All milk and milk products with a fat content <0.5%, cheeses with a fat content <10%, and curd cheese/quark and cream cheese with a fat content <10%.                   |                              | No association with T2D                                    |
|                                                                |                                           |                                     |                                      |                               |                                                                  | Semi-skimmed dairy | All milk and milk products with a fat content ≥1.50%-≤1.80%, cheeses with a fat content >10% <50%, and curd cheese/quark and cream cheese with a fat content ≥10%-≤34%. |                              | No association with T2D                                    |
|                                                                |                                           |                                     |                                      |                               |                                                                  | Full-fat dairy     | All milk and milk products with a fat content >1.80%, cheeses with a fat content ≥50%, and curd cheese/quark and cream cheese with a fat content ≥35%.                  |                              | No association with T2D                                    |
|                                                                |                                           |                                     |                                      |                               |                                                                  | Fermented dairy    | All types of yogurt, curd cheese/quark, buttermilk, and cheese.                                                                                                         |                              | No association with T2D                                    |
| Chen et al.<br>2014 (5)/<br>United<br>States                   | Y                                         | Y                                   | Y                                    | Longitudinal<br>, 18-30 years | 194458 women, aged 43<br>years, BMI 24.4 kg/m <sup>2</sup>       | Total dairy        | NA                                                                                                                                                                      | Updated<br>validated<br>FFQ  | No association with T2D                                    |
|                                                                |                                           |                                     |                                      |                               |                                                                  | Low-fat dairy      | NA                                                                                                                                                                      |                              | No association with T2D                                    |
|                                                                |                                           |                                     |                                      |                               |                                                                  | High-fat dairy     | NA                                                                                                                                                                      |                              | No association with T2D                                    |
|                                                                |                                           |                                     |                                      |                               |                                                                  | Low-fat milk       | NA                                                                                                                                                                      |                              | No association with T2D                                    |
|                                                                |                                           |                                     |                                      |                               |                                                                  | High-fat milk      | NA                                                                                                                                                                      |                              | No association with T2D                                    |
|                                                                |                                           |                                     |                                      |                               |                                                                  | Cheese             | NA                                                                                                                                                                      |                              | No association with T2D                                    |
|                                                                |                                           |                                     |                                      |                               |                                                                  | Yogurt             | NA                                                                                                                                                                      |                              | T2D↓ in higher<br>consumers compared to<br>lower consumers |
|                                                                |                                           |                                     |                                      |                               |                                                                  | Cream              | NA                                                                                                                                                                      |                              | No association with T2D                                    |
| Ice cream                                                      | NA                                        | No association with T2D             |                                      |                               |                                                                  |                    |                                                                                                                                                                         |                              |                                                            |
| Diaz-<br>Lopez et<br>al. 2016<br>(6)/ Spain                    | Y                                         | N                                   | N                                    | Longitudinal<br>, 4.1 years   | 3454 men and women, aged<br>67 years, BMI 30 kg/m <sup>2</sup>   | Total dairy        | All types of milk, yogurt and cheeses, custard, whipped cream, butter, and ice cream                                                                                    | FFQ                          | T2D↓ in higher<br>consumers compared to<br>lower consumers |
|                                                                |                                           |                                     |                                      |                               |                                                                  | Low-fat dairy      | Semi-skim/skim milk and skim yogurt                                                                                                                                     |                              | T2D↓ in higher<br>consumers compared to<br>lower consumers |
|                                                                |                                           |                                     |                                      |                               |                                                                  | High-fat dairy     | Whole-fat milk and whole-fat yogurt                                                                                                                                     |                              | No association with T2D                                    |

## Supplementary Data

|                                        |   |   |   |                        |                                                                |                          |                                                                                                                                                                               |                                            |                                                      |
|----------------------------------------|---|---|---|------------------------|----------------------------------------------------------------|--------------------------|-------------------------------------------------------------------------------------------------------------------------------------------------------------------------------|--------------------------------------------|------------------------------------------------------|
|                                        |   |   |   |                        |                                                                | Total milk               | Total, low-fat, and whole-fat milk                                                                                                                                            |                                            | No association with T2D                              |
|                                        |   |   |   |                        |                                                                | Low-fat milk             | NA                                                                                                                                                                            |                                            | No association with T2D                              |
|                                        |   |   |   |                        |                                                                | High-fat milk            | NA                                                                                                                                                                            |                                            | T2D↓ in higher consumers compared to lower consumers |
|                                        |   |   |   |                        |                                                                | Fermented dairy          | All types of yogurt and cheeses                                                                                                                                               |                                            | T2D↓ in higher consumers compared to lower consumers |
|                                        |   |   |   |                        |                                                                | Cheese                   | Petit Suisse, ricotta, cottage, spreadable, and semi-cured/cured cheeses                                                                                                      |                                            | No association with T2D                              |
|                                        |   |   |   |                        |                                                                | Yogurt                   | Total, low-fat and whole-fat yogurt                                                                                                                                           |                                            | T2D↓ in higher consumers compared to lower consumers |
| Elwood et al. 2007 (7)/ United Kingdom | Y | Y | Y | Longitudinal, 20 years | 2375 men, aged 52 years, BMI 26 kg/m <sup>2</sup>              | Total dairy              | Milk, butter, cheese, cream and yogurt                                                                                                                                        | 7-day weighed dietary intake records       | No association with T2D                              |
|                                        |   |   |   |                        |                                                                | Total milk               | All milk drunk and added to drinks, milk added to cereals, milk used in puddings and other recipes, together with dried milk converted to the equivalent weight of whole milk |                                            | No association with T2D                              |
| Ericson et al. 2015 (8)/ Sweden        | Y | Y | N | Longitudinal, 14 years | 26930 men and women, aged 58 years, BMI 25.8 kg/m <sup>2</sup> | Total dairy              | Milk, yoghurt, sour milk, cream, cheese, ice cream and butter                                                                                                                 | 7-day menu book and 168-item questionnaire | No association with T2D                              |
|                                        |   |   |   |                        |                                                                | Low-fat dairy            | Low-fat alternatives of milk (<2.5% fat), yoghurt (<2.5% fat), sour milk (<2.5% fat), cream (≤12% fat) and cheese (≤20% fat)                                                  |                                            | No association with T2D                              |
|                                        |   |   |   |                        |                                                                | Low-fat fermented dairy  | Low-fat alternatives of yoghurt, sour milk and cheese                                                                                                                         |                                            | No association with T2D                              |
|                                        |   |   |   |                        |                                                                | High-fat dairy           | Butter and high-fat (=regular fat) alternatives of milk (≥2.5% fat), yoghurt (≥2.5% fat), sour milk (≥2.5% fat), cream (>12% fat) and cheese (>20% fat)                       |                                            | T2D↓ in higher consumers compared to lower consumers |
|                                        |   |   |   |                        |                                                                | High-fat fermented dairy | High-fat alternatives of yoghurt, sour milk and cheese                                                                                                                        |                                            | T2D↓ in higher consumers compared to lower consumers |
|                                        |   |   |   |                        |                                                                | Milk                     | Non-fermented milk, yoghurt and sour milk                                                                                                                                     |                                            | T2D↑ in higher consumers compared to lower consumers |
|                                        |   |   |   |                        |                                                                | Low-fat milk             | Low-fat alternatives of milk                                                                                                                                                  |                                            | No association with T2D                              |
|                                        |   |   |   |                        |                                                                | High-fat milk            | High-fat alternatives of milk, yoghurt and sour milk                                                                                                                          |                                            | No association with T2D                              |
|                                        |   |   |   |                        |                                                                | Cheese                   | All types                                                                                                                                                                     |                                            | No association with T2D                              |
|                                        |   |   |   |                        |                                                                | Cream                    | All types                                                                                                                                                                     |                                            | T2D↓ in higher consumers compared to lower consumers |

Supplementary Data

|                                       |   |   |   |                          |                                                                | Butter                      | Butter and butter/oil-blends                                                                |                     | T2D↓ in higher consumers compared to lower consumers                                  |
|---------------------------------------|---|---|---|--------------------------|----------------------------------------------------------------|-----------------------------|---------------------------------------------------------------------------------------------|---------------------|---------------------------------------------------------------------------------------|
| Fuhrman et al. 2009 (9)/ Puerto Rico  | Y | N | N | Longitudinal , 2.6 years | 4685 men, aged 58 years, BMI 25.8 kg/m <sup>2</sup>            | Milk                        | Amounts consumed with coffee and separately                                                 | 24-h dietary recall | T2D↓ in higher consumers compared to lower consumers                                  |
| Grantham et al. 2013 (10)/ Australia  | Y | Y | Y | Longitudinal , 5 years   | 5582 men and women, aged 51 years, BMI NA                      | Total dairy<br>Low-fat milk | Milk, cheese and yogurt together<br>NA                                                      | FFQ                 | No association with T2D<br>T2D↓ in higher consumers compared to lower consumers       |
|                                       |   |   |   |                          |                                                                | High-fat milk               | NA                                                                                          |                     | No association with T2D                                                               |
|                                       |   |   |   |                          |                                                                | Cheese                      | NA                                                                                          |                     | No association with T2D                                                               |
|                                       |   |   |   |                          |                                                                | Yogurt                      | D                                                                                           |                     | No association with T2D                                                               |
| Hruby et al. 2017 (11)/ United States | N | N | N | Longitudinal , 12 years  | 2809 men and women, aged 54 years, BMI 27.1 kg/m <sup>2</sup>  | Total dairy                 | Milk, sherbet and ice milk, ice cream, yogurt, cottage and ricotta cheese, and other cheese | FFQ                 | Prediabetes↓ in higher consumers compared to lower consumers                          |
|                                       |   |   |   |                          |                                                                | High-fat dairy              | Whole milk, ice cream, cottage and ricotta cheese, and other cheese                         |                     | Prediabetes↓ and T2D↓ in higher consumers compared to lower consumers                 |
|                                       |   |   |   |                          |                                                                | Low-fat dairy               | Skim milk, sherbet and ice milk, and yogurt                                                 |                     | Prediabetes↓ in higher consumers compared to lower consumers                          |
|                                       |   |   |   |                          |                                                                | Total milk                  | Full-fat and skim and low-fat milk                                                          |                     | No association with prediabetes                                                       |
|                                       |   |   |   |                          |                                                                | Skim milk                   | NA                                                                                          |                     | No association with prediabetes                                                       |
|                                       |   |   |   |                          |                                                                | Whole milk                  | NA                                                                                          |                     | Prediabetes↓ in higher consumers compared to lower consumers                          |
|                                       |   |   |   |                          |                                                                | Cheese                      | Cottage and ricotta cheese and other cheese                                                 |                     | No association with prediabetes; T2D↓ in higher consumers compared to lower consumers |
|                                       |   |   |   |                          |                                                                | Cream and butter            | NA                                                                                          |                     | No association with prediabetes                                                       |
|                                       |   |   |   |                          |                                                                | Yogurt                      | NA                                                                                          |                     | No association with prediabetes                                                       |
|                                       | Y | Y | Y | Longitudinal , 5 years   | 59796 men and women, aged 57 years, BMI 23.6 kg/m <sup>2</sup> | Total dairy                 | NA                                                                                          | FFQ                 | Women: T2D↓ in higher consumers compared to                                           |

## Supplementary Data

|                                                      |   |   |   |                            |                                                                  |                |                                                                                                                                                                                                                                      |     |                                                            |
|------------------------------------------------------|---|---|---|----------------------------|------------------------------------------------------------------|----------------|--------------------------------------------------------------------------------------------------------------------------------------------------------------------------------------------------------------------------------------|-----|------------------------------------------------------------|
| Kirii et al.<br>2009 (12)/<br>Japan                  |   |   |   |                            |                                                                  | Total milk     | NA                                                                                                                                                                                                                                   |     | lower consumers; Men:<br>no association with T2D           |
|                                                      |   |   |   |                            |                                                                  | Cheese         | NA                                                                                                                                                                                                                                   |     | No association with T2D                                    |
|                                                      |   |   |   |                            |                                                                  | Yogurt         | NA                                                                                                                                                                                                                                   |     | No association with T2D                                    |
| Liu et al.<br>2006 (13)/<br>United<br>States         | Y | Y | Y | Longitudinal<br>, 10 years | 37183 women, aged 55 years,<br>BMI 25.9 kg/m <sup>2</sup>        | Total dairy    | Skim or low-fat milk, sherbet, yogurt,<br>and cottage/ricotta cheese, whole milk,<br>cream, sour cream, ice cream, cream<br>cheese, and other cheese                                                                                 | FFQ | T2D↓ in higher<br>consumers compared to<br>lower consumers |
|                                                      |   |   |   |                            |                                                                  | Low-fat dairy  | Skim or low-fat milk, sherbet, yogurt,<br>and cottage/ricotta cheese                                                                                                                                                                 |     | T2D↓ in higher<br>consumers compared to<br>lower consumers |
|                                                      |   |   |   |                            |                                                                  | High-fat dairy | Whole milk, cream, sour cream, ice<br>cream, cream cheese, and other cheese                                                                                                                                                          |     | No association with T2D                                    |
|                                                      |   |   |   |                            |                                                                  | Low-fat milk   | NA                                                                                                                                                                                                                                   |     | No association with T2D                                    |
|                                                      |   |   |   |                            |                                                                  | High-fat milk  | NA                                                                                                                                                                                                                                   |     | No association with T2D                                    |
|                                                      |   |   |   |                            |                                                                  | Cheese         | NA                                                                                                                                                                                                                                   |     | No association with T2D                                    |
|                                                      |   |   |   |                            |                                                                  | Yogurt         | NA                                                                                                                                                                                                                                   |     | T2D↓ in higher<br>consumers compared to<br>lower consumers |
|                                                      |   |   |   |                            |                                                                  | Cream          | NA                                                                                                                                                                                                                                   |     | No association with T2D                                    |
|                                                      |   |   |   |                            |                                                                  | Ice cream      | NA                                                                                                                                                                                                                                   |     | No association with T2D                                    |
| Louie et al.<br>2013 (14)/<br>Australia              | Y | Y | Y | Longitudinal<br>, 10 years | 1824 men and women, aged<br>64 years, BMI 26.2 kg/m <sup>2</sup> | Total dairy    | Regular milk, reduced fat/skim milk,<br>low-fat cheese, regular cheese, reduced<br>fat dairy dessert (e.g. low fat yogurt), and<br>medium fat dairy dessert (e.g. custard<br>and regular yogurt)                                     | FFQ | No association with T2D                                    |
|                                                      |   |   |   |                            |                                                                  | Low-fat dairy  | Reduced fat/skim milk, reduced fat dairy<br>dessert and low- fat cheese                                                                                                                                                              |     | No association with T2D                                    |
|                                                      |   |   |   |                            |                                                                  | High-fat dairy | Regular milk, regular cheese and<br>medium-fat dairy dessert                                                                                                                                                                         |     | No association with T2D                                    |
| Margolis et<br>al. 2011<br>(15)/<br>United<br>States | Y | Y | Y | Longitudinal<br>, 8 years  | 82076 women, aged 63 years,<br>BMI 27 kg/m <sup>2</sup>          | Total dairy    | Intake of milk as a beverage, on cereal,<br>or in coffee or tea, cheese (including<br>cheese in entrees and mixed dishes and<br>cottage cheese and ricotta cheese), cream<br>soups, yogurt, ice cream, pudding,<br>custard, and flan | FFQ | No association with T2D                                    |
|                                                      |   |   |   |                            |                                                                  | Low-fat dairy  | Low-fat milk (non-fat milk, skim milk,<br>or 1% milk), low-fat cottage cheese,<br>part-skim or reduced-fat cheese, non-fat<br>yogurt, and low-fat or non-fat frozen<br>desserts                                                      |     | T2D↓ in higher<br>consumers compared to<br>lower consumers |

## Supplementary Data

|                                           |   |   |   |                        |                                                                       |                                                                                                                                                     |                                                                                                                                                                                                                                                                                                                                                                                                                                                                                                                                                                                                                                                                                                                                                                                                                      |                                                                    |                                                                                                                                                                                                                        |
|-------------------------------------------|---|---|---|------------------------|-----------------------------------------------------------------------|-----------------------------------------------------------------------------------------------------------------------------------------------------|----------------------------------------------------------------------------------------------------------------------------------------------------------------------------------------------------------------------------------------------------------------------------------------------------------------------------------------------------------------------------------------------------------------------------------------------------------------------------------------------------------------------------------------------------------------------------------------------------------------------------------------------------------------------------------------------------------------------------------------------------------------------------------------------------------------------|--------------------------------------------------------------------|------------------------------------------------------------------------------------------------------------------------------------------------------------------------------------------------------------------------|
|                                           |   |   |   |                        |                                                                       | Yogurt                                                                                                                                              | NA                                                                                                                                                                                                                                                                                                                                                                                                                                                                                                                                                                                                                                                                                                                                                                                                                   |                                                                    | T2D↓ in higher consumers compared to lower consumers                                                                                                                                                                   |
| Montonen et al. 2005 (16)/ Finland        | Y | Y | Y | Longitudinal, 23 years | 4304 men and women, aged 52 years, BMI 26.5 kg/m <sup>2</sup>         | High-fat dairy<br>Reduced-fat dairy<br>Milk<br>Butter                                                                                               | Cheese, cream, ice cream and yogurt<br>Skimmed and low-fat milk, low-fat cheese<br>Whole milk<br>NA                                                                                                                                                                                                                                                                                                                                                                                                                                                                                                                                                                                                                                                                                                                  | Dietary history interview with the use of a 100-item questionnaire | No association with T2D<br>No association with T2D<br>No association with T2D<br>No association with T2D                                                                                                               |
| Nettleton et al. 2008 (17)/ United States | Y | N | N | Longitudinal, 11 years | 4127 men and women, aged 61 years, BMI 27.9 kg/m <sup>2</sup>         | Low-fat dairy<br>High-fat dairy                                                                                                                     | NA<br>Whole milk and high-fat cheese/cream sauces                                                                                                                                                                                                                                                                                                                                                                                                                                                                                                                                                                                                                                                                                                                                                                    | Validated 120-item FFQ                                             | No association with T2D<br>No association with T2D                                                                                                                                                                     |
| O'Connor et al. 2014 (18)/ United Kindom  | Y | N | N | Longitudinal, 11 years | 3502 adults, men and women, aged 59 years, BMI 26.3 kg/m <sup>2</sup> | Total dairy<br><br>High-fat dairy<br><br>Low-fat dairy<br><br>Milk<br>Yogurt<br><br>Cheese<br><br>Total fermented dairy<br>High-fat fermented dairy | Butter, cheese, cream, crème fraîche, dried/powdered milk (made up weight), evaporated milk, milk, sour cream, yoghurt, baby milk<br>Butter, full fat unripened cheese, all hard, processed and soft cheese, cream, sour cream, crème fraîche, whole milk, whole dried/powdered milk (made up weight), all evaporated milk, baby milk<br>Low-fat unripened cheese, semi-skimmed milk, skimmed milk, dried semi-skimmed/skimmed milk, all yoghurt<br>Liquid and powdered/dried milk (made up weight); cow, sheep and goat sources<br>Full-, low-, reduced-, 0%- fat varieties<br>Hard, processed, soft (e.g. brie) and unripened (e.g. mozzarella, fromage frais, ricotta)<br>All yoghurt, all cheese, sour cream and crème fraîche<br>Hard cheese, soft cheese, high-fat unripened cheese, sour cream, crème fraîche | 7-day diet diary                                                   | No association with T2D<br>No association with T2D<br>No association with T2D<br>No association with T2D<br>T2D↓ in higher consumers compared to lower consumers<br>No association with T2D<br>No association with T2D |

## Supplementary Data

|                                                 |   |   |   |                         |                                                                 |                         |                                                                                                                                                                                                                                                                                                         |                       |                                                      |
|-------------------------------------------------|---|---|---|-------------------------|-----------------------------------------------------------------|-------------------------|---------------------------------------------------------------------------------------------------------------------------------------------------------------------------------------------------------------------------------------------------------------------------------------------------------|-----------------------|------------------------------------------------------|
| Sluijs et al. 2012 (19)/ 8 countries in Europe  | Y | Y | Y | Longitudinal , 12 years | 340234 men and women, aged 52 years, BMI 26.1 kg/m <sup>2</sup> | Low-fat fermented dairy | All yoghurt, low-fat unripened cheeses (e.g. fromage frais, low-fat cottage cheese)                                                                                                                                                                                                                     | Semi quantitative FFQ | T2D↓ in higher consumers compared to lower consumers |
|                                                 |   |   |   |                         |                                                                 | Total dairy             | Milk (both nonfermented milk and fermented milk such as buttermilk), milk beverages (eg, chocolate milk), yogurt and thick fermented milk (eg, sour milk), curd (eg, quark), cream desserts (eg, custard), dairy creams (eg, whipped cream), milk for coffee and creamers, and cheese, excluding butter |                       | No association with T2D                              |
|                                                 |   |   |   |                         |                                                                 | Total milk              | NA                                                                                                                                                                                                                                                                                                      |                       | No association with T2D                              |
|                                                 |   |   |   |                         |                                                                 | Fermented dairy         | Cheese, yogurt, and thick fermented milk                                                                                                                                                                                                                                                                |                       | T2D↓ in higher consumers compared to lower consumers |
| Soedamah-Muthu et al. 2013 (20)/ United Kingdom | Y | Y | Y | Longitudinal , 10 years | 4186 men and women, aged 56 years, BMI 25.9 kg/m <sup>2</sup>   | Cheese                  | NA                                                                                                                                                                                                                                                                                                      | FFQ                   | T2D↓ in higher consumers compared to lower consumers |
|                                                 |   |   |   |                         |                                                                 | Yogurt                  | Yogurt and thick fermented milk                                                                                                                                                                                                                                                                         |                       | No association with T2D                              |
|                                                 |   |   |   |                         |                                                                 | Total dairy             | All dairy products, except butter and ice cream                                                                                                                                                                                                                                                         |                       | No association with T2D                              |
|                                                 |   |   |   |                         |                                                                 | High-fat dairy          | Full-fat cheese, yogurt, milk puddings, whole and Channel Islands milk                                                                                                                                                                                                                                  |                       | No association with T2D                              |
|                                                 |   |   |   |                         |                                                                 | Low-fat dairy           | Cottage cheese, semi-skimmed, skimmed milk and milk-based hot drinks                                                                                                                                                                                                                                    |                       | No association with T2D                              |
|                                                 |   |   |   |                         |                                                                 | Total milk              | Whole and low-fat milk                                                                                                                                                                                                                                                                                  |                       | No association with T2D                              |
| Struijk et al. 2013 (21)/ Denmark               | Y | Y | Y | Longitudinal , 5 years  | 5953 men and women, aged 46 years, BMI 26.1 kg/m <sup>2</sup>   | Fermented dairy         | Yogurt and total cheese                                                                                                                                                                                                                                                                                 | FFQ                   | No association with T2D                              |
|                                                 |   |   |   |                         |                                                                 | Cheese                  | Full-fat cheese and cottage                                                                                                                                                                                                                                                                             |                       | No association with T2D                              |
|                                                 |   |   |   |                         |                                                                 | Yogurt                  | NA                                                                                                                                                                                                                                                                                                      |                       | No association with T2D                              |
|                                                 |   |   |   |                         |                                                                 | Total dairy             | All dairy food products except for butter and ice cream                                                                                                                                                                                                                                                 |                       | No association with T2D                              |
|                                                 |   |   |   |                         |                                                                 | Low-fat dairy           | Skimmed and semi-skimmed milk and milk products with a total fat content of <2 g/100 g and cheese with a total fat content of <20 g/100g                                                                                                                                                                |                       | No association with T2D                              |
|                                                 |   |   |   |                         |                                                                 | High-fat dairy          | Whole milk and milk products with a total fat content of ≥2 g/100 g and cheese with a total fat content of ≥20 g/100 g                                                                                                                                                                                  |                       | No association with T2D                              |
| Struijk et al. 2013 (21)/ Denmark               | Y | Y | Y | Longitudinal , 5 years  | 5953 men and women, aged 46 years, BMI 26.1 kg/m <sup>2</sup>   | Total milk              | Milk and milk products included all dairy products except cheese                                                                                                                                                                                                                                        | FFQ                   | No association with T2D                              |
|                                                 |   |   |   |                         |                                                                 | Fermented dairy         | Buttermilk, yogurt and cheese                                                                                                                                                                                                                                                                           |                       | No association with T2D                              |
|                                                 |   |   |   |                         |                                                                 | Cheese                  | All types of cheese except curd                                                                                                                                                                                                                                                                         |                       | No association with T2D                              |

## Supplementary Data

|                                         |   |   |   |                          |                                                                |                 |                                                                                                                                                                                                                |                                                |                                                      |
|-----------------------------------------|---|---|---|--------------------------|----------------------------------------------------------------|-----------------|----------------------------------------------------------------------------------------------------------------------------------------------------------------------------------------------------------------|------------------------------------------------|------------------------------------------------------|
| Talaei et al. 2017 (22)/ Singapore      | N | N | N | Longitudinal, 12 years   | 45411 men and women, aged 55 years, BMI 23.1 kg/m <sup>2</sup> | Dairy products  | Milk (powdered, whole, low-fat and chocolate but excluding addition to coffee or tea), Milo, Ovaltine, or Horlicks, and Yakult or Vitagen (probiotic cultured milk drinks)                                     | semi-quantitative food frequency questionnaire | T2D↓ in higher consumers compared to lower consumers |
|                                         |   |   |   |                          |                                                                | Milk            | Powdered, whole, low-fat and chocolate but excluding addition to coffee or tea                                                                                                                                 |                                                | T2D↓ in higher consumers compared to non-consumers   |
| van Dam et al. 2006 (23)/ United States | Y | Y | Y | Longitudinal, 8 years    | 41186 women, aged 39 years, BMI 27.6 kg/m <sup>2</sup>         | Total dairy     | Whole milk, 2% milk, skim milk, 1% milk or buttermilk, milk or cream in coffee or tea, yogurt, frozen yogurt, ice cream, butter on bread or rolls, and cheeses and cheese spreads not including cottage cheese | FFQ                                            | No association with T2D                              |
|                                         |   |   |   |                          |                                                                | Low-fat dairy   | Reduced-fat milk (≤2% fat), reduced-fat yogurt, and reduced-fat frozen yogurt                                                                                                                                  |                                                | T2D↓ in higher consumers compared to lower consumers |
|                                         |   |   |   |                          |                                                                | High-fat dairy  | Dairy items not included in low-fat dairy group                                                                                                                                                                |                                                | No association with T2D                              |
| von Ruesten. 2013 (24)/ Germany         | N | N | Y | Longitudinal, 8 years    | 23531 men and women, aged 35-65 years, BMI NA                  | High-fat dairy  | Normal- or high-fat variants of: milk/milkshake, yoghurt, fruit yoghurt, soured milk/kefir, curd/curd with herbs                                                                                               | FFQ                                            | No association with T2D                              |
|                                         |   |   |   |                          |                                                                | Low-fat dairy   | Fat-reduced variants of: milk/milkshake (1.5% fat or less), yoghurt, fruit yoghurt (1.5% fat or less), soured milk/kefir, curd/curd with herbs                                                                 |                                                | No association with T2D                              |
|                                         |   |   |   |                          |                                                                | High-fat cheese | Normal- or high-fat variants of: Cream cheese, processed cheese, hard cheese (for example, gouda, Emmental cheese, Tilsiter cheese), soft cheese (for example, camembert, brie, gorgonzola), whipped cream     |                                                | No association with T2D                              |
|                                         |   |   |   |                          |                                                                | Low-fat cheese  | Fat-reduced variants of: Cream cheese, hard cheese (for example, gouda, Emmental cheese, Tilsiter cheese), soft cheese (for example, camembert, brie, gorgonzola)                                              |                                                | No association with T2D                              |
| Villegas et al. 2009 (25)/ China        | Y | Y | Y | Longitudinal, 6.9 years  | 64169 women, aged 50 years, BMI 23.8 kg/m <sup>2</sup>         | High-fat milk   | Fresh milk                                                                                                                                                                                                     | In-person interviews using FFQ                 | T2D↓ in higher consumers compared to lower consumers |
| Virtanen et al. 2017 (26)/ Finland      | N | N | N | Longitudinal, 19.3 years | 2332 men, aged 53 years, BMI 26.2 kg/m <sup>2</sup>            | Total dairy     | Non-fermented dairy products (mainly milk, cream and ice cream) and fermented dairy products (mainly sour milk, curdled milk, yogurt and cheese)                                                               | 4-d dietary records                            | No association with T2D                              |
|                                         |   |   |   |                          |                                                                | Milk            | NA                                                                                                                                                                                                             |                                                | No association with T2D                              |



## Supplementary Data

|                                      |   |   |   |                        |                                                               |                          |                                                                                                                   |             |                                                      |
|--------------------------------------|---|---|---|------------------------|---------------------------------------------------------------|--------------------------|-------------------------------------------------------------------------------------------------------------------|-------------|------------------------------------------------------|
|                                      |   |   |   |                        |                                                               | Fermented dairy products | Sour milk, curdled milk, yogurt and cheese                                                                        |             | No association with T2D                              |
|                                      |   |   |   |                        |                                                               | Cheese                   | NA                                                                                                                |             | No association with T2D                              |
| Vang et al. 2008 (27)/ United States | Y | N | Y | Longitudinal, 17 years | 8401 men and women, aged 65 years, BMI 24.5 kg/m <sup>2</sup> | Total milk               | NA                                                                                                                | Self-report | No association with T2D                              |
|                                      |   |   |   |                        |                                                               | Cheese                   | NA                                                                                                                |             | No association with T2D                              |
| Zong et al. 2014 (28)/ China         | Y | N | N | Longitudinal, 6 years  | 2091 men and women, aged 59 years, BMI 24.3 kg/m <sup>2</sup> | Total dairy              | Milk, yogurt, ice cream, milk powder, and other products (milk flake, cheese, cream, cream cake, evaporated milk) | FFQ         | T2D↓ in higher consumers compared to lower consumers |
|                                      |   |   |   |                        |                                                               | Total milk               | NA                                                                                                                |             | T2D↓ in higher consumers compared to lower consumers |

---

Body mass index (BMI); Food frequency questionnaire (FFQ); Fasting Glucose (FG); Glycated haemoglobin (HbA1c); Not Available (NA); No (N); 2-h Postload Glucose (PG); Type 2 diabetes (T2D); Yes (Y).

### Supplemental References

1. Gijsbers L, Ding EL, Malik VS, de Goede J, Geleijnse JM, Soedamah-Muthu SS. Consumption of dairy foods and diabetes incidence: a dose-response meta-analysis of observational studies. *Am J Clin Nutr* 2016; 103: 1111-24.
2. Gao D, Ning N, Wang C, Wang Y, Li Q, Meng Z, Liu Y, Li Q. Dairy products consumption and risk of type 2 diabetes: systematic review and dose-response meta-analysis. *PLoS One* 2013; 8: e73965.
3. Aune D, Norat T, Romundstad P, Vatten LJ. Dairy products and the risk of type 2 diabetes: a systematic review and dose-response meta-analysis of cohort studies. *Am J Clin Nutr* 2013; 98: 1066-83.
4. Brouwer-Brolsma EM, van Woudenberg GJ, Oude Elferink SJ, Singh-Povel CM, Hofman A, Dehghan A, Franco OH, Feskens EJ. Intake of different types of dairy and its prospective association with risk of type 2 diabetes: The Rotterdam Study. *Nutr Metab Cardiovasc Dis* 2016; 26: 987-995.
5. Chen M, Sun Q, Giovannucci E, Mozaffarian D, Manson JE, Willett WC, Hu FB. Dairy consumption and risk of type 2 diabetes: 3 cohorts of US adults and an updated meta-analysis. *BMC Med* 2014; 12: 215.
6. Diaz-Lopez A, Bullo M, Martinez-Gonzalez MA, Corella D, Estruch R, Fito M, Gomez-Gracia E, Fiol M, Garcia de la Corte FJ, Ros E et al. Dairy product consumption and risk of type 2 diabetes in an elderly Spanish Mediterranean population at high cardiovascular risk. *Eur J Nutr* 2016; 55: 349-60.
7. Elwood PC, Pickering JE, Fehily AM. Milk and dairy consumption, diabetes and the metabolic syndrome: the Caerphilly prospective study. *J Epidemiol Community Health* 2007; 61: 695-8.
8. Ericson U, Hellstrand S, Brunkwall L, Schulz CA, Sonestedt E, Wallstrom P, Gullberg B, Wirfalt E, Orho-Melander M. Food sources of fat may clarify the inconsistent role of dietary fat intake for incidence of type 2 diabetes. *Am J Clin Nutr* 2015; 101: 1065-80.
9. Fuhrman BJ, Smit E, Crespo CJ, Garcia-Palmieri MR. Coffee intake and risk of incident diabetes in Puerto Rican men: results from the Puerto Rico Heart Health Program. *Public Health Nutr* 2009; 12: 842-8.
10. Grantham NM, Magliano DJ, Hodge A, Jowett J, Meikle P, Shaw JE. The association between dairy food intake and the incidence of diabetes in Australia: the Australian Diabetes Obesity and Lifestyle Study (AusDiab). *Public Health Nutr* 2013; 16: 339-45.
11. Hruby A, Ma J, Rogers G, Meigs JB, Jacques PF. Associations of Dairy Intake with Incident Prediabetes or Diabetes in Middle-Aged Adults Vary by Both Dairy Type and Glycemic Status. *J Nutr* 2017; 147: 1764-1775.
12. Kirii K, Mizoue T, Iso H, Takahashi Y, Kato M, Inoue M, Noda M, Tsugane S, Japan Public Health Center-based Prospective Study G. Calcium, vitamin D and dairy intake in relation to type 2 diabetes risk in a Japanese cohort. *Diabetologia* 2009; 52: 2542-50.
13. Liu S, Choi HK, Ford E, Song Y, Klevak A, Buring JE, Manson JE. A prospective study of dairy intake and the risk of type 2 diabetes in women. *Diabetes Care* 2006; 29: 1579-84.
14. Louie JC, Flood VM, Rangan AM, Burlutsky G, Gill TP, Gopinath B, Mitchell P. Higher regular fat dairy consumption is associated with lower incidence of metabolic syndrome but not type 2 diabetes. *Nutr Metab Cardiovasc Dis* 2013; 23: 816-21.
15. Margolis KL, Wei F, de Boer IH, Howard BV, Liu S, Manson JE, Mossavar-Rahmani Y, Phillips LS, Shikany JM, Tinker LF et al. A diet high in low-fat dairy products lowers diabetes risk in postmenopausal women. *J Nutr* 2011; 141: 1969-74.
16. Montonen J, Jarvinen R, Heliövaara M, Reunanen A, Aromaa A, Knekt P. Food consumption and the incidence of type II diabetes mellitus. *Eur J Clin Nutr* 2005; 59: 441-8.
17. Nettleton JA, Steffen LM, Ni H, Liu K, Jacobs DR, Jr. Dietary patterns and risk of incident type 2 diabetes in the Multi-Ethnic Study of Atherosclerosis (MESA). *Diabetes Care* 2008; 31: 1777-82.

## Supplementary Data

18. O'Connor LM, Lentjes MA, Luben RN, Khaw KT, Wareham NJ, Forouhi NG. Dietary dairy product intake and incident type 2 diabetes: a prospective study using dietary data from a 7-day food diary. *Diabetologia* 2014; 57: 909-17.
19. Sluijs I, Forouhi NG, Beulens JW, van der Schouw YT, Agnoli C, Arriola L, Balkau B, Barricarte A, Boeing H, Bueno-de-Mesquita HB et al. The amount and type of dairy product intake and incident type 2 diabetes: results from the EPIC-InterAct Study. *Am J Clin Nutr* 2012; 96: 382-90.
20. Soedamah-Muthu SS, Masset G, Verberne L, Geleijnse JM, Brunner EJ. Consumption of dairy products and associations with incident diabetes, CHD and mortality in the Whitehall II study. *Br J Nutr* 2013; 109: 718-26.
21. Struijk EA, Heraclides A, Witte DR, Soedamah-Muthu SS, Geleijnse JM, Toft U, Lau CJ. Dairy product intake in relation to glucose regulation indices and risk of type 2 diabetes. *Nutr Metab Cardiovasc Dis* 2013; 23: 822-8.
22. Talaei M, Pan A, Yuan JM, Koh WP. Dairy intake and risk of type 2 diabetes. *Clin Nutr* 2017
23. van Dam RM, Hu FB, Rosenberg L, Krishnan S, Palmer JR. Dietary calcium and magnesium, major food sources, and risk of type 2 diabetes in U.S. black women. *Diabetes Care* 2006; 29: 2238-43.
24. von Ruesten A, Feller S, Bergmann MM, Boeing H. Diet and risk of chronic diseases: results from the first 8 years of follow-up in the EPIC-Potsdam study. *Eur J Clin Nutr* 2013; 67: 412-9.
25. Villegas R, Gao YT, Dai Q, Yang G, Cai H, Li H, Zheng W, Shu XO. Dietary calcium and magnesium intakes and the risk of type 2 diabetes: the Shanghai Women's Health Study. *Am J Clin Nutr* 2009; 89: 1059-67.
26. Virtanen HEK, Koskinen TT, Voutilainen S, Mursu J, Tuomainen TP, Kokko P, Virtanen JK. Intake of different dietary proteins and risk of type 2 diabetes in men: the Kuopio Ischaemic Heart Disease Risk Factor Study. *Br J Nutr* 2017; 117: 882-893.
27. Vang A, Singh PN, Lee JW, Haddad EH, Brinegar CH. Meats, processed meats, obesity, weight gain and occurrence of diabetes among adults: findings from Adventist Health Studies. *Ann Nutr Metab* 2008; 52: 96-104.
28. Zong G, Sun Q, Yu D, Zhu J, Sun L, Ye X, Li H, Jin Q, Zheng H, Hu FB et al. Dairy consumption, type 2 diabetes, and changes in cardiometabolic traits: a prospective cohort study of middle-aged and older Chinese in Beijing and Shanghai. *Diabetes Care* 2014; 37: 56-63.
